# Supplementary material for: Rapid deterioration in buried leather: archaeological implications
Source: PubMed Central journal article supplement — RSC Adv. 2024 Jan 25;14(6):3762–70. doi: 10.1039/d3ra07020d (PMC10808855; doi:10.1039/d3ra07020d), 2024-01-25
Supplement: RA-014-D3RA07020D-s001.pdf [file RA-014-D3RA07020D-s001.pdf]

## Supplementary Information

**Title:** Rapid deterioration in buried leather: Archaeological implications

**Authorship:** Halldórsdóttir, H.H., Williams, R., Greene, E.M., Taylor, G.

**Table 1.0: Bond vibrations and FTIR peaks commonly seen in the spectra of skin, vegetable tannins and oils. Full citations provided separately at the end of this document.**

| Component        | Peaks (cm <sup>-1</sup> )                                           | Indication                                                                                                                          | Citation                                  |
|------------------|---------------------------------------------------------------------|-------------------------------------------------------------------------------------------------------------------------------------|-------------------------------------------|
| Collagen         | ↑ Amide I (1700-1600) & II (1580-1510)                              | Hydrolysis of collagen                                                                                                              | (Albu et al., 2010)                       |
|                  | Δ Amide I & II position                                             | collagen denaturation and gelatinisation                                                                                            |                                           |
|                  | Amide III: 1400-1200                                                | The 1450 cm <sup>-1</sup> peak is associated with good collagen triple helix integrity                                              | (Sendrea et al., 2016)                    |
| Vegetable tannin | 1615-1601   1518-1507 & 1452-1446   1211-1196 & 1043-1030           | Associated with all classes of tannins                                                                                              | (Falcão and Araújo, 2018)                 |
|                  | 1288-1282, 1162-1155, 1116-1110, 872-870                            | Characteristic peaks for condensed tannins                                                                                          |                                           |
|                  | 1731-1704 with 1325-1317 region                                     | Hydrolysable tannins – condensed tannin peaks                                                                                       |                                           |
|                  | 1088-1082, 872-870, or 763-758                                      | Presence of gallotannin, identified by presence of weak bands                                                                       |                                           |
| Lipids           | Symmetric & asymmetric CH <sub>2</sub> stretching at ~2920 and 2850 | Attributed to lipids. Although, the ~1750 cm <sup>-1</sup> peak has also been associated with peptide oxidation in FTIR analyses of | (Greve et al., 2008, Sommer et al., 2017, |

|                  |                                                                            |                                                                                                                 |                                                                     |
|------------------|----------------------------------------------------------------------------|-----------------------------------------------------------------------------------------------------------------|---------------------------------------------------------------------|
|                  | a C=O stretching at ~1750                                                  | historical parchment and leather.                                                                               | Odlyha, 2007, Carsote and Badea, 2019, Derrick, 1991)               |
|                  | CH <sub>2</sub> twisting at ~1300                                          |                                                                                                                 |                                                                     |
| Other components | ~1000                                                                      | Silicates, common in FTIR spectra of soil                                                                       | (Kögel-Knabner, 2002, Xu et al., 2019, Xu et al., 2020)             |
|                  | Gypsum   1110<br>Calcium stearate   1575 & 1415<br>CaCO <sub>3</sub>   875 | Assigned to the use of metal soaps to remove excess fat from historical book leather.                           | (Vichi et al., 2018)                                                |
|                  | 2900, 1701, 1453 & 1383                                                    | Associated with the presence of underlying resins after analysis of historical gilt and painted leather by FTIR | (Vichi et al., 2018)                                                |
| Collagen Ratios  | Amide A/amide I ratio (AA/AI)                                              | Associated with degree of crosslinking. Higher values indicate dissolution of crosslinking                      | (Albu et al., 2010, Vyskočilová et al., 2019, Sendrea et al., 2016) |
|                  | Amide I/amide II ratio (AI/AII)                                            | Indicates hydrolysis of the collagen secondary structure chain                                                  | (Albu et al., 2010)                                                 |
|                  | Amide III/1450 cm <sup>-1</sup> ratio (AIII/1450)                          | Assess triple helix conformity                                                                                  |                                                                     |

|  |                                                                                                             |                                                                        |                                               |
|--|-------------------------------------------------------------------------------------------------------------|------------------------------------------------------------------------|-----------------------------------------------|
|  | Ratio of the two shoulders at ~1620 cm <sup>-1</sup> and ~1650 cm <sup>-1</sup> (1620/1650)                 | Assess extent of denaturation in waterlogged leather samples           | (Godfrey and Kasi, 1998)                      |
|  | Difference between wavenumber positions of the highest absorption in amide I and II peaks ( $\Delta I/II$ ) | Higher values associated with collagen denaturation and gelatinisation | (Albu et al., 2010, Vyskočilová et al., 2019) |

**Table 2.0 Leather and soil sample archaeological context description, including soil pH measurement results and notes on preservation, provided by the Vindolanda Trust.**

| Context | Soil pH                | Time Period | date    | Context Type                                       | Colour              | Composition            | Texture      | Inclusion    | Preservations notes                                           |
|---------|------------------------|-------------|---------|----------------------------------------------------|---------------------|------------------------|--------------|--------------|---------------------------------------------------------------|
| V18-44  | 5.67-6.04              | Antonine    | 213-275 | Clay packing above wattle, daub and stone building | Dark greybrown      | Clay                   | Firm         | Large stones | Two leather shoes and scrap leather                           |
| V18-51  | 5.64-6.08              | Antonine    | 180-200 | Top fill of Antonine ditch                         | Greenish black grey | Silt, mud and laminate | Soft to Firm | Finds        | High amounts of leather and wood, 64 leather items and scraps |
| V18-54  | 5.85-6.83              | Antonine    | 213-275 | Wattle and daub drain                              | dark brown          | Silty Soil             | Soft         | Organics     | One leather shoe and leather scraps                           |
| V18-57  | 6.15-6.25              | Severan     | 200-212 | Top fill of Several Ditch                          | Grey                | Silty Clay             | Soft to Firm | Organics     | Seven leather items                                           |
| V18-61  | 5.18-5.51<br>pot, bone | Antonine    | 140-180 | Bottom of Antonine ditch                           | Dark greenish brown | Mud                    | , Soft       | Organics     | Seven leather items                                           |

|        |           |          |         |                     |                 |                   |      |           |                                                    |
|--------|-----------|----------|---------|---------------------|-----------------|-------------------|------|-----------|----------------------------------------------------|
| V18-62 | 4.96-6.08 | Antonine | 180-200 | Antonine ditch fill | Dark green grey | Laminate and silt | Soft | Pot, bone | Six leather shoes and scrap leather                |
| V18-71 | 5.64-5.74 | Severan  | 200-212 | Ditch mud           | Dark greybrown  | Mud and silt      | Soft | Organics  | Five leather items, leather scraps, wood and finds |

**Table 3.0: Parameters of the TQ analyst quantitation file used to collect peak absorbances from vegetable-tanned leather samples. Peak heights and baselines were given as ranges to account for possible shifts caused by bond variations.**

| Peak ID | Peak Wavenumbers    |                               |                               | Baseline Wavenumbers |                               |                               |
|---------|---------------------|-------------------------------|-------------------------------|----------------------|-------------------------------|-------------------------------|
|         | Datapoint Type      | Min Range (cm <sup>-1</sup> ) | Max Range (cm <sup>-1</sup> ) | Datapoint Type       | Min Range (cm <sup>-1</sup> ) | Max Range (cm <sup>-1</sup> ) |
| P3300   | Max height in range | 3111                          | 3450                          | Max height in range  | 1770-1900                     | 3600-3700                     |
| P3010   | Max height in range | 2900                          | 3020                          | Max height in range  | 2750-2760                     | 3000-3050                     |
| P2955   | Max height in range | 2950                          | 2965                          | Max height in range  | 2750-2760                     | 3000-3050                     |
| P2920   | Max height in range | 2900                          | 2940                          | Max height in range  | 2750-2760                     | 3000-3050                     |
| P2850   | Max height in range | 2835                          | 2885                          | Max height in range  | 2700-2770                     | 2975-3055                     |
| P1740   | Max height in range | 1730                          | 1755                          | Max height in range  | 1690-1725                     | 1760-1790                     |
| P1720   | Max height in range | 1680                          | 1725                          | Max height in range  | 1670-1680                     | 1725-1735                     |
| P1650   | Max height in range | 1640                          | 1670                          | Max height in range  | 850-900                       | 1780-1800                     |
| P1620   | Max height in range | 1590                          | 1645                          | Max height in range  | 850-900                       | 1780-1800                     |
| P1575   | Max height in range | 1560                          | 1580                          | Max height in range  | 850-900                       | 1780-1800                     |
| P1535   | Max height in range | 1520                          | 1560                          | Max height in range  | 1470-1500                     | 1550-1590                     |
| P1515   | Max height in range | 1495                          | 1520                          | Max height in range  | 1470-1500                     | 1550-1590                     |
| P1450   | Max height in range | 1435                          | 1465                          | Max height in range  | 1385-1425                     | 1475-1490                     |
| P1400   | Max height in range | 1380                          | 1410                          | Max height in range  | 1250-1270                     | 1405-1430                     |
| P1365   | Max height in range | 1365                          | 1385                          | Max height in range  | 1250-1270                     | 1405-1430                     |
| P1335   | Max height in range | 1325                          | 1345                          | Max height in range  | 1250-1270                     | 1405-1430                     |
| P1315   | Max height in range | 1295                          | 1320                          | Max height in range  | 1250-1270                     | 1405-1430                     |
| P1225   | Max height in range | 1210                          | 1235                          | Max height in range  | 890-950                       | 1250-1290                     |
| P1200   | Max height in range | 1190                          | 1205                          | Max height in range  | 890-950                       | 1250-1290                     |
| P1160   | Max height in range | 1035                          | 1185                          | Max height in range  | 890-950                       | 1250-1290                     |
| P1080   | Max height in range | 1065                          | 1090                          | Max height in range  | 890-950                       | 1250-1290                     |
| P1030   | Max height in range | 1010                          | 1054                          | Max height in range  | 890-950                       | 1250-1290                     |

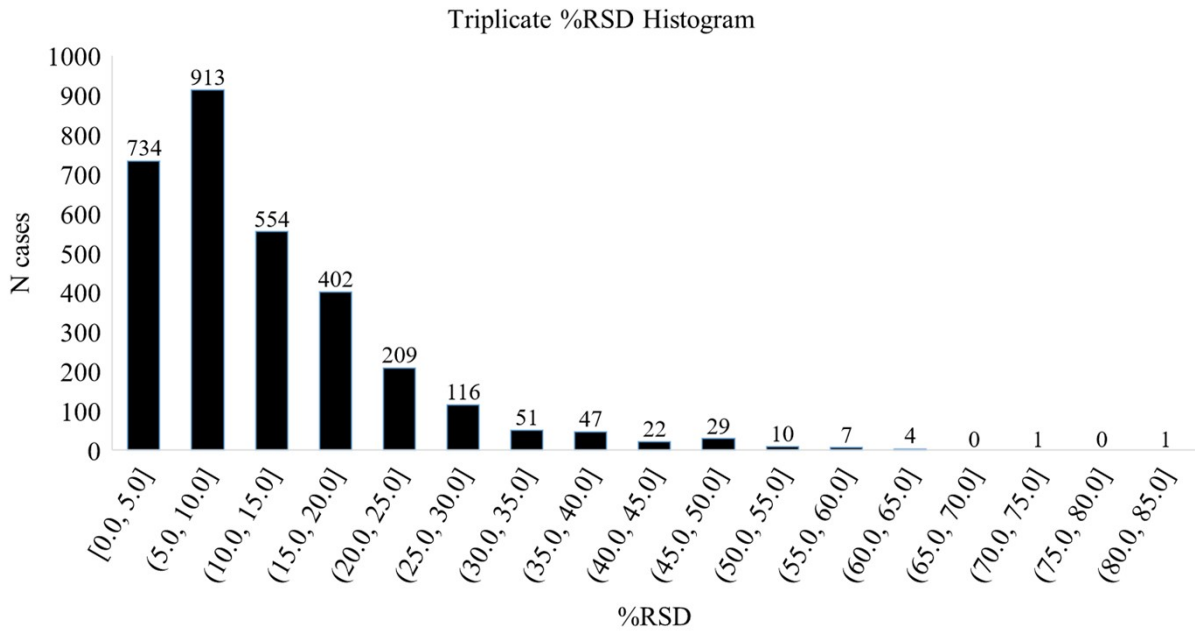

Figure 1.0: Relative standard deviations (%RSD) between triplicate measurements of modern experimentally buried leather samples

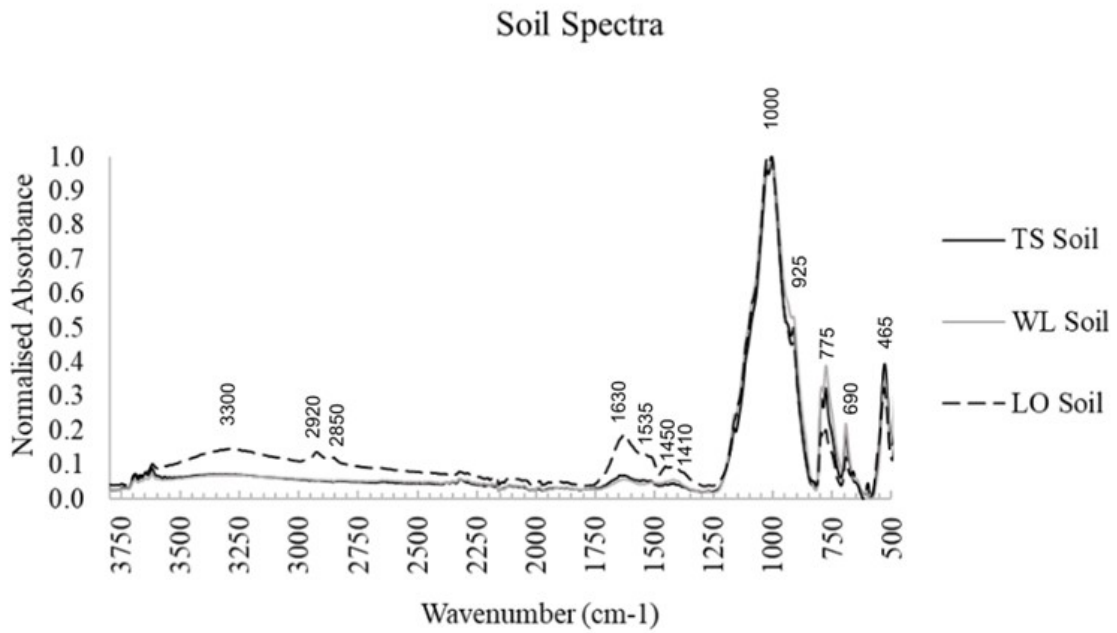

Figure 2.0: FTIR spectra of the microcosm soils. TS = typical soil, WL = waterlogged soil, LO = low oxygen soil

### Oak Leather Tanning Agents

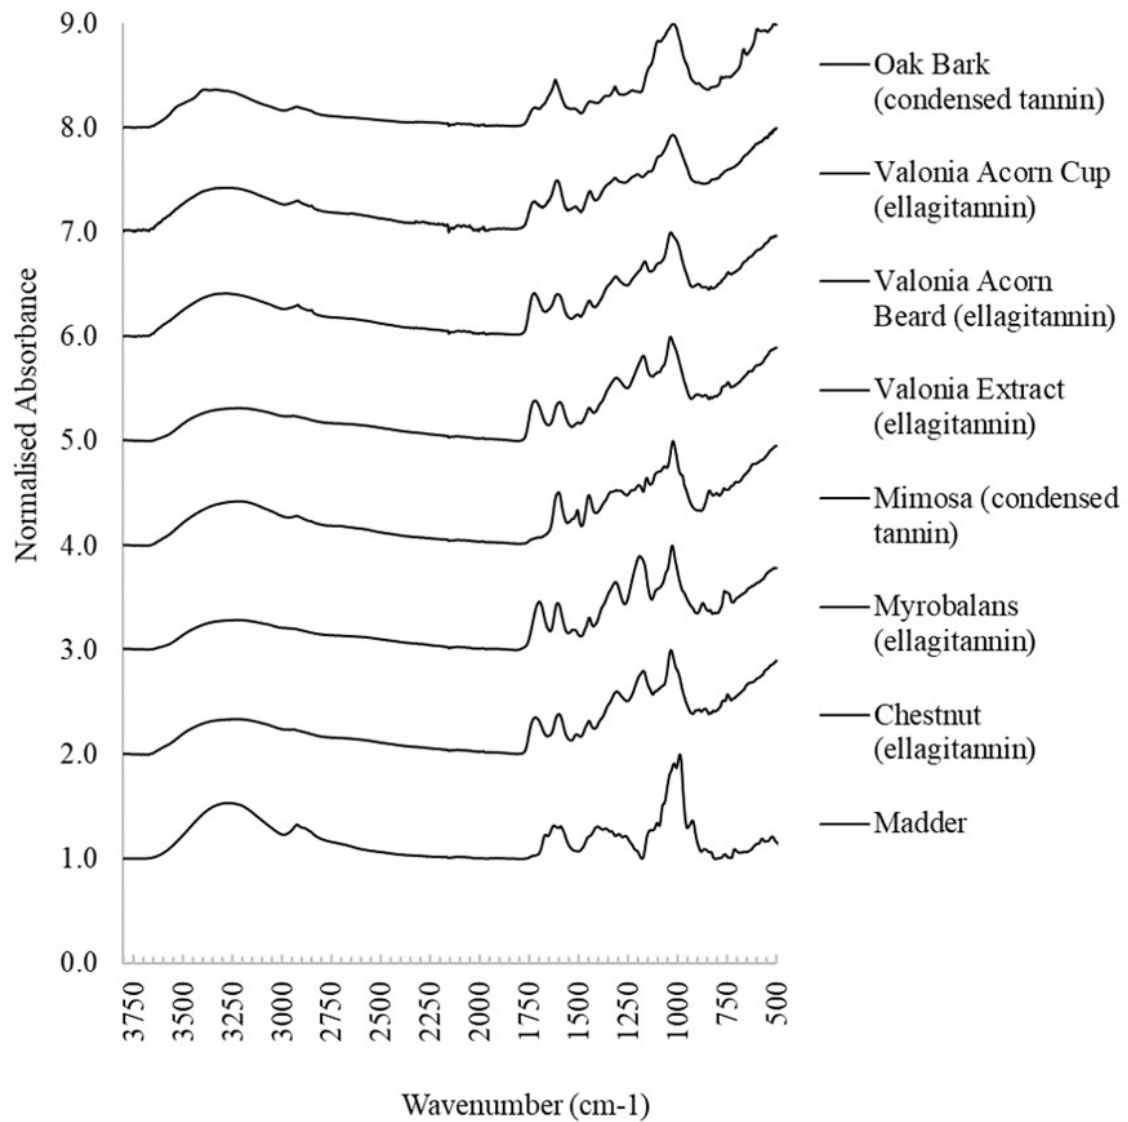

Figure 3.0: FTIR spectra of tanning agents for oak leather samples

## Supplementary Information References

- ALBU, M. G., GHICA, M. V., LECA, M., POPA, L., BORLESCU, C., CREMENESCU, E., GIURGINCA, M. & TRANDAFIR, V. 2010. Doxycycline delivery from collagen matrices crosslinked with tannic acid. *Molecular Crystals and Liquid Crystals*, 523, 97/[669]-105/[677].
- CARSOTE, C. & BADEA, E. 2019. Micro differential scanning calorimetry and micro hot table method for quantifying deterioration of historical leather. *Heritage Science*, 7.
- DERRICK, M. 1991. Evaluation of the state of degradation of Dead Sea Scroll samples using FT-IR spectroscopy',. *The Book and Paper Group Annual*, 10, 49-65.
- FALCÃO, L. & ARAÚJO, M. E. M. 2018. Vegetable tannins used in the manufacture of historic leathers. *Molecules*, 23.
- GODFREY, I. & KASI, K. 1998. The analysis and treatment of waterlogged leather I: Denaturation and defibrilisation studies.
- GREVE, T. M., ANDERSEN, K. B. & NIELSEN, O. F. 2008. ATR-FTIR, FT-NIR and near-FT-Raman spectroscopic studies of molecular composition in human skin in vivo and pig ear skin in vitro. *Spectroscopy*, 22, 437-457.
- KÖGEL-KNABNER, I. 2002. The macromolecular organic composition of Plant and microbial residues as inputs to soil organic matter. *Soil Biology and Biochemistry*, 34, 139-162.
- ODLYHA, M. 2007. Thermoanalytical (macro- to nanoscale) techniques and non-invasive spectroscopic analysis for damage assessment of parchment. In: LARSEN, C. S. (ed.) *IDAP: Improved Damage Assessment of Parchment. Assessment, data collection and sharing of knowledge. Research Report no 18*. Luxembourg:: European Communities.
- SENDREA, C., CARSOTE, C., BADEA, E., ADAMS, A., NICULESCU, M. & IOVU, H. 2016. NON-INVASIVE CHARACTERISATION OF COLLAGENBASED MATERIALS BY NMR-MOUSE AND. *U.P.B. Scientific Bulletin, Series B*, 78, 27-38.
- SOMMER, D. V. P., MÜHLEN AXELSSON, K., COLLINS, M. J., FIDDYMENT, S., BREDAL-JØRGENSEN, J., SIMONSEN, K. P., LAURIDSEN, C. B. & LARSEN, R. 2017. Multiple Microanalyses of a Sample from the Vinland Map. *Archaeometry*, 59, 287-301.
- VICHI, A., ELIAZYAN, G. & KAZARIAN, S. G. 2018. Study of the Degradation and Conservation of Historical Leather Book Covers with Macro Attenuated Total Reflection-Fourier Transform Infrared Spectroscopic Imaging. *ACS Omega*, 3, 7150-7157.
- VYSKOČILOVÁ, G., EBERSBACH, M., KOPECKÁ, R., PROKEŠ, L. & PŘÍHODA, J. 2019. Model study of the leather degradation by oxidation and hydrolysis. *Heritage Science*, 7.
- XU, X., DU, C., MA, F., SHEN, Y., WU, K., LIANG, D. & ZHOU, J. 2019. Detection of soil organic matter from laser-induced breakdown spectroscopy (LIBS) and mid-infrared spectroscopy (FTIR-ATR) coupled with multivariate techniques. *Geoderma*, 355.
- XU, X., DU, C., MA, F., SHEN, Y. & ZHOU, J. 2020. Forensic soil analysis using laser-induced breakdown spectroscopy (LIBS) and Fourier transform infrared total attenuated reflectance spectroscopy (FTIR-ATR): Principles and case studies. *Forensic Science International*, 310.
